# Supplementary material
Source: MDPI journal article supplement (https://www.mdpi.com/1424-2818/13/10/493)
Supplement: s1 [file s1]

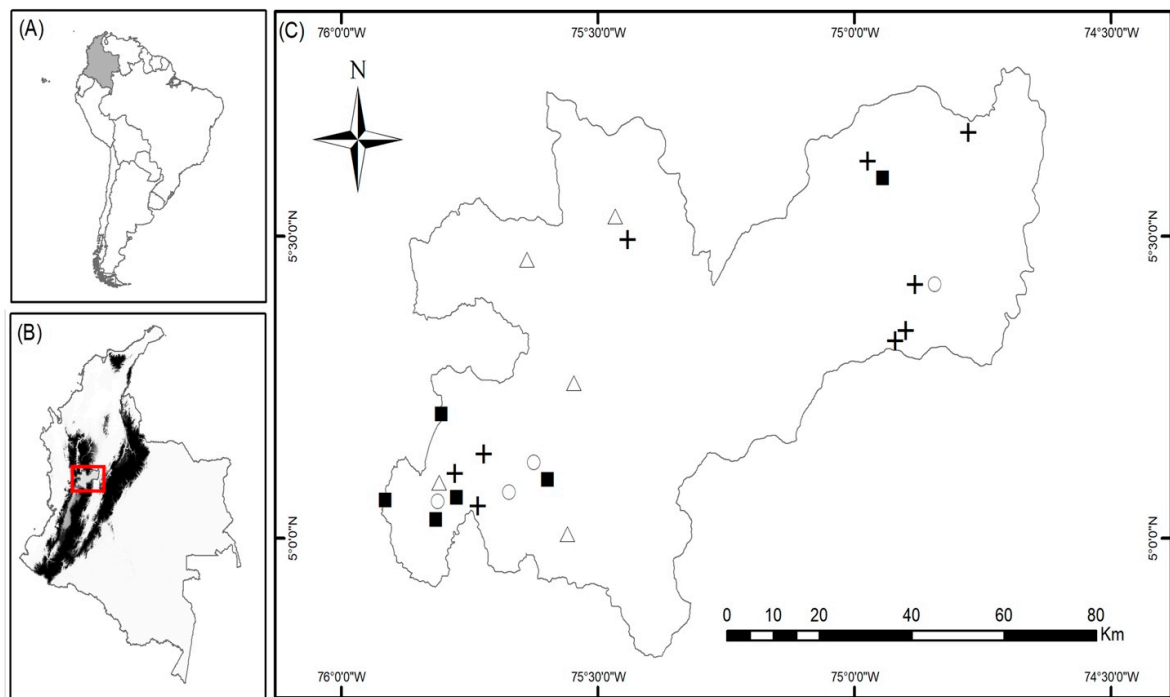

**Figure S1.** (A) Geographic location of Colombia within South America. (B) Location of the Caldas department within Colombia. (C) Sampling site location of cocoa crops (■), coffee crops (△), citrus crops (○), and secondary forests (+).

**Table S1.** Functional traits of bird species in agroecosystems (CC = cocoa crops, CF = coffee crops, CT = citrus crops) and secondary forests (SF). Trait abbreviations are: BD: bill Depth (mm), Ta: Tarsus length (mm), T: Tail Length (mm), W: Weight (g), WC: Wing Chord (mm), BW: Bill Width (mm), TC: Total Culmination (mm), Fr: frugivore, Gr: Granivore, In: Insectivorous, Ne: Nectarivore, Cu: Cup, En: Enclosed, Ho: Hole, Pl: Platform, Ca: Canopy, Sca: sub-canopy, Un: Underbrush, Grf: Ground, Fv: Flower visiting, Ru: Rummage, Tr: trapper, Th: thief, F: Forest, FE: Forest Edge, Os: Open Site.

| Family      | Species                             | Abundance |    |    |    |      | Morphological Traits |      |       |      |      |      | Life history and behavioral traits |            |                 |                     |               |
|-------------|-------------------------------------|-----------|----|----|----|------|----------------------|------|-------|------|------|------|------------------------------------|------------|-----------------|---------------------|---------------|
|             |                                     | CC        | CF | CT | SF | BD   | TC                   | BW   | WC    | Ta   | T    | W    | Diet                               | Nest types | Foraging strata | Foraging strategies | Habitat Pref. |
| Tinamidae   | <i>Crypturellus soui</i>            |           |    |    | x  | 4.1  | 16.3                 | 4.3  | 95    | 33.8 | 33   | 88   | Fr - Gr - In                       | Pl         | Grf             | Ru                  | F             |
| Columbidae  | <i>Leptotila verreauxi</i>          | x         | x  | x  |    | 7    | 17.3                 | 4.8  | 137   | 33.1 | 101  | 137  | Fr - Gr                            | Pl         | Grf             | Ru                  | FE - Os       |
|             | <i>Zenaida auriculata</i>           |           | x  | x  |    | 4    | 18.3                 | 4.2  | 135   | 22.5 | 96.5 | 110  | Gr                                 | Pl         | Grf             | Ru                  | F - Os        |
|             | <i>Columbina passerina</i>          |           |    | x  |    | 2.9  | 12.9                 | 2.3  | 74.5  | 19.6 | 57   | 30   | Fr - Gr                            | Pl         | Grf             | Ru                  | Os            |
|             | <i>Columbina minuta</i>             | x         |    | x  |    | 3.2  | 10.9                 | 3.6  | 76    | 18   | 55   | 36.5 | Gr                                 | Cu         | Grf             | Ru                  | Os            |
|             | <i>Columbina talpacoti</i>          | x         | x  | x  | x  | 4    | 14.7                 | 3.6  | 88.5  | 20.4 | 71   | 46   | Gr - In                            | Pl         | Grf             | Ru                  | Os            |
| Cuculidae   | <i>Crotophaga ani</i>               | x         | x  |    |    | 24.3 | 34.4                 | 12.2 | 151   | 39   | 214  | 119  | In                                 | Pl         | Un - Grf        | Ru - Tr             | Os            |
|             | <i>Piaya cayana</i>                 |           | x  |    |    | 10.9 | 31.4                 | 10.2 | 144   | 29.3 | 265  | 102  | In                                 | Pl         | Ca              | Ru                  | FE            |
|             | <i>Coccyzus americanus</i>          |           |    | x  |    | 8.4  | 29.3                 | 7.5  | 141.5 | 20.2 | 153  | 55   | In                                 | Pl         | Un              | Ru                  | FE - Os       |
| Trochilidae | <i>Florisuga mellivora</i>          | x         | x  | x  | x  | 3    | 24.4                 | 5.1  | 71    | 5.6  | 40   | 7.3  | In - Ne                            | Cu         | Un              | Fv - Ru - Th        | FE            |
|             | <i>Glaucis hirsutus</i>             |           |    | x  | x  | 4    | 34.9                 | 3.5  | 60    | 3    | 41   | 6    | In - Ne                            | Cu         | Un              | Fv - Ru             | FE - Os       |
|             | <i>Phaethornis striigularis</i>     | x         |    | x  | x  | 2.1  | 24.9                 | 4.9  | 39    | 4.1  | 38.5 | 2.4  | In - Ne                            | Cu         | Un              | Fv - Ru             | F - FE        |
|             | <i>Phaethornis anthophilus</i>      |           |    |    | x  | 2.2  | 36.3                 | 3.8  | 57.5  | 2.9  | 66.5 | 5.5  | In - Ne                            | Cu         | Un              | Fv - Ru             | FE            |
|             | <i>Phaethornis guy</i>              | x         |    | x  | x  | 2.9  | 43.4                 | 3.2  | 60    | 5    | 68   | 5.7  | In - Ne                            | Cu         | Un              | Fv - Ru - Tr        | F             |
|             | <i>Phaethornis syrmatophorus</i>    |           |    |    | x  | 2.4  | 43.5                 | 4.7  | 60.3  | 4.3  | 65   | 5.9  | In - Ne                            | En         | Un              | Ru                  | F - FE        |
|             | <i>Colibri coruscans</i>            |           | x  |    |    | 2.2  | 26.7                 | 2.5  | 74    | 5.5  | 45   | 8.5  | In - Ne                            | Cu         | Ca - Sca - Un   | Fv - Th             | FE            |
|             | <i>Anthracothonax nigricollis</i>   | x         | x  | x  |    | 2.3  | 25.5                 | 2.6  | 68.5  | 120  | 40.5 | 8    | In - Ne                            | Cu         | Un              | Ru                  | FE - Os       |
|             | <i>Ensifera ensifera</i>            |           | x  |    |    | 2.7  | 91.9                 | 2.4  | 71    | 6.2  | 44   | 8.8  | Ne                                 | Cu         | Un              | Fv                  | F - FE        |
|             | <i>Ocreatus underwoodii</i>         |           | x  |    |    | 1.5  | 14.9                 | 1.7  | 57    | 2.4  | 32   | 7    | In - Ne                            | Cu         | Un              | Fv - Tr - Th        | FE            |
|             | <i>Chlorostilbon melanorhynchus</i> | x         | x  | x  | x  | 2    | 15.9                 | 2.2  | 45    | 2.9  | 28   | 3    | In - Ne                            | Cu         | Un              | Fv                  | FE            |
|             | <i>Chlorostilbon gibsoni</i>        |           | x  |    |    | 2.3  | 19.5                 | 2.1  | 52    | 2.8  | 27.5 | 4.5  | In - Ne                            | Cu         | Un              | Fv                  | F - FE        |
|             | <i>Chalybura buffonii</i>           | x         |    | x  | x  | 2.7  | 27.2                 | 5.3  | 63    | 6.2  | 39.6 | 5.5  | In - Ne                            | Cu         | Un              | Ru                  | FE - Os       |

|                       |                                        |   |   |   |   |      |      |      |       |      |      |       |         |    |                |         |             |
|-----------------------|----------------------------------------|---|---|---|---|------|------|------|-------|------|------|-------|---------|----|----------------|---------|-------------|
|                       | <i>Saucerottia saucerottei</i>         | x | x | x | x | 2.3  | 20.5 | 2.4  | 51    | 5.5  | 31   | 4.1   | In - Ne | Cu | Un             | Ru      | Os          |
|                       | <i>Amazilia tzacatl</i>                | x | x | x | x | 2.5  | 22.4 | 3.9  | 55    | 2.9  | 35   | 5     | In - Ne | Cu | Un             | Ru      | Os          |
|                       | <i>Uranomitra franciae</i>             |   | x |   |   | 2    | 23.2 | 2.5  | 53    | 100  | 34.5 | 4     | In - Ne | Cu | Un             | Ru      | FE          |
|                       | <i>Polyerata amabilis</i>              |   |   |   | x | 2.4  | 22.1 | 2.5  | 50    | 3.8  | 30   | 3.8   | In - Ne | Cu | Un - Grf       | Fv      | FE          |
|                       | <i>Baryphthengus martii</i>            |   |   |   | x | 13.9 | 14.2 | 11.9 | 146   | 38.7 | 210  | 200   | Fr - In | Ho | Un - Grf       | Ru      | F - FE      |
| Momotidae             | <i>Momotus subrufescens</i>            |   |   |   | x | 10.9 | 42.4 | 9.1  | 128   | 31.7 | 204  | 87    | Fr - In | Ho | Sca - Un - Grf | Ru - Tr | F - FE - Os |
|                       | <i>Momotus aequatorialis</i>           | x |   |   |   | 14.5 | 44.5 | 12.2 | 155   | 36.7 | 305  | 172.6 | Fr - In | Ho | Sca - Un       | Ru      | F - FE - Os |
| Bucconidae            | <i>Malacoptila mystacalis</i>          |   |   |   | x | 10.4 | 34   | 12.1 | 92    | 20   | 98   | 48.5  | In      | Ho | Sca - Un - Grf | Ru      | F - FE      |
| Capitonidae           | <i>Capito hypoleucus</i>               | x |   |   |   | 10.7 | 24.4 | 9.6  | 88    | 29.3 | 60   | 67    | Fr - In | Ho | Ca - Sca       | Ru      | F - FE      |
|                       | <i>Melanerpes formicivorus</i>         |   | x |   |   | 7.1  | 25.2 | 8.6  | 137   | 18.6 | 85   | 73    | Fr - In | Ho | Ca - Sca       | Ru      | F - FE      |
|                       | <i>Melanerpes rubricapillus</i>        | x |   | x |   | 7.6  | 24.7 | 4.9  | 102   | 23.8 | 60   | 45.5  | Fr - In | Ho | Ca - Sca       | Ru      | F - FE      |
| Picidae               | <i>Veniliornis kirkii</i>              | x |   |   | x | 5.9  | 20.4 | 5.5  | 84    | 16.2 | 56   | 26.9  | In      | Ho | Ca - Sca       | Ru      | F           |
|                       | <i>Celeus loricatus</i>                |   |   |   | x | 7.2  | 22.4 | 7.1  | 115.5 | 23   | 72.5 | 71.5  | Fr - In | Ho | Sca - Un - Grf | Ru      | FE          |
|                       | <i>Colaptes punctigula</i>             | x |   | x |   | 7.5  | 25.1 | 8.4  | 110.5 | 21.2 | 81.5 | 55    | Fr - In | Ho | Ca             | Ru      | FE - Os     |
| Falconidae            | <i>Milvago chimachima</i>              |   |   | x |   | 14.5 | 30.7 | 12.2 | 285   | 50.2 | 190  | 500   |         | Pl | Ca - Grf       | Tr      | Os          |
| Psittacidae           | <i>Pionus menstruus</i>                |   |   |   | x | 22.4 | 26.1 | 12.6 | 186   | 6.7  | 89   | 247   | Fr - Gr | Ho | Ca             | Ru      | F           |
|                       | <i>Forpus conspicillatus</i>           | x |   | x | x | 8.2  | 14.4 | 12.2 | 76    | 13.3 | 45   | 23    | Gr      | Ho | Ca             | Ru      | Os          |
|                       | <i>Taraba major</i>                    |   |   |   | x | 10.1 | 28.5 | 8    | 91    | 31.9 | 82   | 68    | In      | Cu | Un             | Ru      | FE          |
| Thamno-<br>philidae   | <i>Thamnophilus multistriatus</i>      | x |   | x |   | 6.2  | 21.8 | 11.1 | 70.5  | 23.5 | 65   | 24    | In      | Cu | Ca - Un        | Ru      | FE          |
|                       | <i>Thamnophilus atrinucha</i>          |   |   |   | x | 6.5  | 22.8 | 5.6  | 70    | 21.7 | 57.5 | 21.8  | In      | Cu | Un             | Ru      | FE          |
|                       | <i>Formicivora grisea</i>              |   |   |   | x | 3.7  | 16.4 | 4    | 51    | 22.9 | 49   | 15    | In      | Cu | Un             | Ru - Tr | F - FE      |
|                       | <i>Poliocrania exsul</i>               |   |   |   | x | 4.7  | 20.3 | 4.6  | 68    | 28.9 | 42   | 27    | In      | En | Ca             | Ru      | F           |
|                       | <i>Glyphorynchus spirurus</i>          |   |   |   | x | 4    | 12   | 4.6  | 66.5  | 19.9 | 65   | 14    | In      | Ho | Sca - Un       | Ru      | F           |
|                       | <i>Xiphorhynchus susurrans</i>         |   | x |   | x | 7.3  | 36.6 | 14.3 | 103.5 | 23.4 | 97   | 44.6  | In      | Ho | Ca - Un        | Ru      | Os          |
|                       | <i>Dendroplex picus</i>                |   |   | x | x | 7.2  | 28.5 | 4.7  | 95    | 22   | 86   | 27    | In      | Ho | Un             | Ru      | FE - Os     |
| Furnariidae           | <i>Campylorhamphus trochilirostris</i> |   |   |   | x | 5.5  | 59.3 | 4.1  | 95    | 24.1 | 92   | 41    | In      | Ho | Sca - Un       | Ru      | F           |
|                       | <i>Lepidocolaptes souleyetii</i>       | x |   | x |   | 5.5  | 29.9 | 3.2  | 91.5  | 19.2 | 94   | 30    | Fr - In | Ho | Sca - Un       | Ru      | F - FE      |
|                       | <i>Lepidocolaptes lacrymiger</i>       | x |   |   |   | 5.5  | 30.6 | 4.9  | 105   | 19.4 | 97.5 | 30.1  | In      | Ho | Sca - Un       | Ru      | F - FE      |
|                       | <i>Xenops minutus</i>                  |   |   |   | x | 8.5  | 14.6 | 3.4  | 64    | 15.9 | 52   | 13    | In      | Ho | Un             | Ru      | F - FE      |
|                       | <i>Xenops rutilans</i>                 |   |   |   | x | 5    | 13.7 | 2.7  | 71    | 16.8 | 58   | 14    | In      | Ho | Un             | Ru      | FE          |
|                       | <i>Synallaxis albescens</i>            | x | x | x |   | 4    | 12.1 | 9.3  | 52    | 21.7 | 80   | 15    | In      | En | Un - Grf       | Ru      | FE          |
|                       | <i>Corapipo leucorrohoa</i>            |   |   |   | x | 3.6  | 10.1 | 8.1  | 57    | 16.9 | 31   | 10    | Fr - In | Cu | Un             | Tr      | F           |
| Pipridae              | <i>Lepidothrix coronata</i>            |   |   |   | x | 3.8  | 8.8  | 4.4  | 50.5  | 17.1 | 25   | 10    | Fr - In | Cu | Un             | Ru      | F           |
|                       | <i>Manacus manacus</i>                 |   |   |   | x | 4.1  | 13   | 10.5 | 55    | 21.3 | 32   | 18    | Fr - In | Cu | Un             | Ru      | E - FE      |
|                       | <i>Machaeropterus regulus</i>          |   |   |   | x | 3.8  | 10.6 | 8.5  | 51    | 14   | 20   | 10.5  | Fr - In | Cu | Sca - Un       | Ru      | F - FE      |
|                       | <i>Ceratopipra erythrocephala</i>      |   |   |   | x | 4    | 12.2 | 4.5  | 60    | 14.7 | 20   | 12.2  | Fr - In | Cu | Sca - Un       | Ru      | F           |
|                       | <i>Tityra inquisitor</i>               |   |   |   | x | 9    | 24.6 | 11.5 | 100   | 20.1 | 65   | 41    | Fr - In | Ho | Ca - Sca       | Tr      | F           |
| Tityridae             | <i>Pachyrhamphus polychopterus</i>     | x |   |   |   | 5.3  | 14.3 | 7.1  | 72    | 19.1 | 65   | 22.5  | In      | En | Sca            | Ru      | F - FE      |
|                       | <i>Myiobius atricaudus</i>             |   |   |   | x | 3    | 14.4 | 8.4  | 63    | 18.9 | 60.5 | 10.6  | In      | En | Un             | Ru - Tr | FE          |
| Onychorhyn-<br>chidae | <i>Onychorhynchus coronatus</i>        |   |   |   | x | 5.1  | 22.5 | 11.1 | 87.5  | 19.6 | 76.5 | 22.6  | In      | En | Sca - Un       | Ru      | FE          |
|                       | <i>Mionectes olivaceus</i>             |   | x |   |   | 4    | 14.9 | 4.9  | 68.5  | 16.7 | 58.5 | 9     | Fr - In | En | Un             | Ru - Tr | F - FE      |
|                       | <i>Mionectes oleagineus</i>            | x | x | x | x | 3.4  | 13.3 | 4.8  | 59    | 15.3 | 47   | 10.5  | Fr - In | En | Un             | Ru      | F           |
|                       | <i>Leptopogon amaurocephalus</i>       |   |   | x | x | 3.6  | 13.8 | 4.7  | 63    | 16.1 | 54   | 12    | Fr - In | Cu | Un             | Ru - Tr | F           |
|                       | <i>Leptopogon superciliaris</i>        | x |   |   | x | 3.9  | 14.7 | 9.4  | 65    | 15.5 | 57   | 12.3  | Fr - In | En | Sca - Un       | Ru      | FE          |
|                       | <i>Tolmomyias sulphureus</i>           | x |   | x | x | 4.1  | 16.5 | 12.2 | 66.5  | 18.5 | 60   | 16.8  | In      | En | Sca - Un       | Ru - Tr | Os          |
|                       | <i>Oncostoma olivaceum</i>             |   |   |   | x | 3.5  | 12.7 | 4.7  | 45    | 12.6 | 30   | 7.1   | Fr - In | En | Un             | Tr      | FE          |
|                       | <i>Poecilotriccus sylvia</i>           |   |   |   | x | 3.2  | 14.2 | 5.2  | 50    | 19.4 | 35   | 9     | Fr - In | En | Un             | Ru      | FE          |
|                       | <i>Todirostrum cinereum</i>            | x | x | x | x | 2.9  | 13.5 | 5.6  | 43    | 20.5 | 34.5 | 7     | Fr - In | En | Ca - Un        | Ru      | FE - Os     |
|                       | <i>Zimmerius chrysops</i>              | x | x | x | x | 3.3  | 8.8  | 4.2  | 51.5  | 18.7 | 45   | 9     | In      | En | Ca             | Ru      | FE          |
| Tyrannidae            | <i>Camptostoma obsoletum</i>           |   |   |   | x | 3.9  | 10.8 | 5.8  | 56.5  | 17.4 | 50   | 18    | In      | En | Ca - Un        | Ru      | F - FE - Os |
|                       | <i>Elaenia flavogaster</i>             | x | x | x | x | 4.3  | 12.1 | 6.6  | 77.5  | 23.1 | 71   | 24    | Fr - In | Cu | Sca - Un       | Tr      | FE          |
|                       | <i>Elaenia frantzii</i>                |   | x |   | x | 3.8  | 12.9 | 4.5  | 71    | 14.9 | 67.8 | 15.5  | Fr - In | Cu | Ca - Sca - Un  | Ru      | FE - Os     |
|                       | <i>Tyrannulus elatus</i>               |   |   | x |   | 3    | 8    | 3.4  | 52    | 15   | 42.5 | 8     | Fr - In | Cu | Ca             | Ru      | FE          |
|                       | <i>Myiopagis viridicata</i>            |   |   |   | x | 3.6  | 13.8 | 9.6  | 65    | 18   | 60   | 13.9  | Fr - Gr | Cu | Ca - Sca       | Ru - Tr | F           |
|                       | <i>Phyllomyias griseiceps</i>          | x |   |   |   | 3.7  | 8.1  | 5.3  | 54    | 14.4 | 42.9 | 4.2   | Fr - In | Cu | Ca             | Tr      | FE          |
|                       | <i>Phaeomyias murina</i>               | x | x | x | x | 3.5  | 10.7 | 4.4  | 54.5  | 19.9 | 52.5 | 11.5  | Fr - In | Cu | Ca - Sca       | Ru      | FE          |
|                       | <i>Attila spadiceus</i>                |   |   |   | x | 5.7  | 21.1 | 7.1  | 83    | 27.7 | 74   | 37    | Fr - In | Cu | Ca - Sca       | Ru - Tr | F - FE      |
|                       | <i>Legatus leucophaeus</i>             |   |   |   | x | 4.5  | 7.8  | 6.3  | 77    | 14.7 | 55   | 21    | Fr - In | En | Ca - Sca       | Ru      | FE          |

|                |                                     |   |   |   |     |      |      |       |      |      |      |         |         |               |               |         |        |
|----------------|-------------------------------------|---|---|---|-----|------|------|-------|------|------|------|---------|---------|---------------|---------------|---------|--------|
|                | <i>Pitangus sulphuratus</i>         | x | x |   | 9.1 | 27.9 | 10.6 | 110.5 | 27.9 | 82.5 | 61   | Fr - In | En      | Ca - Un       | Tr            | FE - Os |        |
|                | <i>Megarynchus pitangua</i>         | x |   |   | 8.9 | 35.9 | 10.1 | 105   | 20.1 | 87   | 63   | Fr - In | Cu      | Ca - Sca      | Ru            | FE      |        |
|                | <i>Myiodynastes chrysocephalus</i>  |   | x |   | 7   | 23.3 | 11.9 | 104   | 16.5 | 90   | 44   | Fr - In | Cu      | Ca            | Tr            | FE      |        |
|                | <i>Myiodynastes luteiventris</i>    |   |   | x | 7.8 | 24.5 | 10.7 | 115   | 16.6 | 80   | 45   | Fr - In | Cu      | Ca - Un       | Ru - Tr       | FE      |        |
|                | <i>Myiodynastes maculatus</i>       | x |   | x | 8.8 | 25.4 | 15.4 | 103.5 | 21.3 | 80   | 43.3 | Fr - In | Cu      | Ca - Un       | Ru - Tr       | FE      |        |
|                | <i>Myiozetetes cayanensis</i>       | x | x |   | 4.8 | 14.2 | 6.3  | 86    | 22.1 | 75.5 | 34   | Fr - In | En      | Ca - Sca      | Tr            | FE      |        |
|                | <i>Tyrannus melancholicus</i>       | x | x | x | 7.7 | 23.5 | 10   | 110   | 21.6 | 97   | 45   | Fr - In | Cu      | Ca - Un       | Tr            | Os      |        |
|                | <i>Tyrannus savana</i>              |   |   | x | 5.2 | 18   | 6.5  | 100   | 16   | 210  | 36   | Fr - In | Cu      | Ca            | Tr            | Os      |        |
|                | <i>Myiarchus cephalotes</i>         |   | x |   | 5.4 | 21.8 | 7.5  | 89    | 22.8 | 91   | 26.5 | In      | Cu      | Ca            | Tr            | FE      |        |
|                | <i>Myiarchus crinitus</i>           |   |   | x | 3.2 | 9.9  | 4.5  | 57    | 20.4 | 50   | 11.5 | Fr - In | Ho      | Ca - Sca      | Ru - Tr       | FE      |        |
|                | <i>Myiophobus fasciatus</i>         | x |   | x | 3.7 | 14.1 | 4.8  | 61    | 19.8 | 55   | 12   | In      | Cu      | Ca - Un       | Ru            | Os      |        |
|                | <i>Pyrocephalus rubinus</i>         |   |   | x | 4.2 | 13.9 | 6.3  | 74.5  | 18.4 | 59   | 15.5 | In      | Cu      | Un - Grf      | Tr            | Os      |        |
|                | <i>Empidonax virescens</i>          | x | x | x | x   | 4.1  | 13   | 7     | 71   | 17.4 | 62.5 | 12.3    | Fr - In | ho            | Ca - Un       | Tr      | FE     |
|                | <i>Empidonax traillii</i>           | x |   | x | 4.8 | 12.3 | 6.2  | 58    | 19.4 | 51   | 10   | In      | Cu      | Un            | Tr            | FE - Os |        |
|                | <i>Contopus sordidulus</i>          |   | x |   | 3.7 | 14.1 | 6.1  | 78    | 16.1 | 62   | 13   | In      | Cu      | Ca - Sca      | Ru - Tr       | FE - Os |        |
|                | <i>Contopus virens</i>              | x |   | x | 4.1 | 15   | 5.7  | 77.5  | 17.7 | 65   | 16.6 | Fr - In | En      | Ca - Sca      | Tr            | FE - Os |        |
| Vireonidae     | <i>Cyclarhis nigrirostris</i>       |   | x |   | 7   | 17.5 | 5.4  | 78    | 21.1 | 75.5 | 29   | In      | Cu      | Ca - Sca - Un | Ru            | FE      |        |
|                | <i>Pachysylvia semibrunnea</i>      |   |   | x | x   | 4.1  | 16.3 | 3.6   | 60   | 18.8 | 52   | 11      | In      | Cu            | Ca - Sca      | Ru      | FE     |
|                | <i>Vireo leucophrys</i>             | x |   | x | 4.1 | 15.2 | 5.1  | 66    | 18.4 | 50   | 15   | In      | Cu      | Un            | Ru            | FE - Os |        |
|                | <i>Vireo olivaceus</i>              | x | x | x | 4.6 | 15.3 | 9    | 73    | 20.6 | 50   | 16.5 | In      | Cu      | Ca - Un       | Ru            | F       |        |
|                | <i>Vireo flavoviridis</i>           | x |   |   | 4.4 | 15.4 | 4.7  | 72.5  | 22.6 | 50   | 17   | Fr - In | En      | Sca           | Ru            | F       |        |
| Hirundinidae   | <i>Stelgidopteryx ruficollis</i>    | x | x | x | x   | 2.6  | 6.3  | 5.2   | 102  | 10.1 | 60   | 14      | In      | Ho            | Un            | Tr      | Os     |
|                | <i>Progne tapera</i>                |   | x |   | 4.7 | 5.6  | 6.2  | 101   | 15.3 | 41   | 35.6 | In      | Ho      | Grf           | Tr            | Os      |        |
| Troglodytidae  | <i>Microcerculus marginatus</i>     |   |   | x | 3.9 | 21   | 9.2  | 59    | 23.4 | 22   | 18.4 | In      | En      | Grf           | Ru            | F       |        |
|                | <i>Troglodytes aedon</i>            | x | x | x | x   | 3.6  | 16.1 | 3.4   | 52   | 22.5 | 42.5 | 16      | In      | Ho            | Un - Grf      | Ru      | FE     |
|                | <i>Pheugopedius fasciatoventris</i> |   |   | x | 5.3 | 20.7 | 5.2  | 69    | 22.6 | 57.5 | 19.5 | In      | En      | Grf           | Ru            | F - FE  |        |
|                | <i>Pheugopedius sclateri</i>        |   |   | x | 4.1 | 13.1 | 3.7  | 57    | 21.9 | 57   | 17   | In      | En      | Un            | Ru            | F       |        |
|                | <i>Henicorhina leucophrys</i>       | x |   | x | 3.3 | 17.4 | 3.7  | 53.5  | 23.9 | 29   | 16.2 | In      | En      | Un            | Ru            | F       |        |
| Poliioptilidae | <i>Poliioptila plumbea</i>          | x | x | x | 2.5 | 12.1 | 3.4  | 52    | 19   | 47   | 6    | In      | Cu      | Ca - Un       | Ru            | FE      |        |
| Turdidae       | <i>Catharus aurantiirostris</i>     |   |   | x | 4.8 | 15.4 | 4.5  | 75    | 30.6 | 65   | 40   | Fr - In | Cu      | Un            | Ru            | FE      |        |
|                | <i>Catharus minimus</i>             |   |   | x | 4.2 | 16.3 | 5.5  | 101   | 30.2 | 70   | 30.6 | Fr - In | Cu      | Un - Grf      | Ru            | FE      |        |
|                | <i>Catharus ustulatus</i>           | x | x | x | x   | 4.2  | 16.2 | 5.4   | 97   | 28.2 | 67   | 29.6    | Fr - In | Cu            | Un - Grf      | Ru      | F - FE |
|                | <i>Turdus leucomelas</i>            | x |   | x | 7   | 15.8 | 8    | 118   | 32.2 | 100  | 61   | Fr - In | Cu      | Sca - Un      | Ru            | Os      |        |
|                | <i>Turdus grayi</i>                 | x | x | x | 7   | 19.9 | 7.3  | 111   | 34.3 | 100  | 64   | Fr - In | Cu      | Grf           | Ru            | Os      |        |
|                | <i>Turdus ignobilis</i>             | x | x | x | x   | 6.5  | 23.5 | 6.7   | 110  | 31.8 | 87   | 64.4    | Fr - In | Cu            | Un - Grf      | Ru      | Os     |
| Estrildidae    | <i>Lonchura malacca</i>             |   |   | x | 8.4 | 12.7 | 7.2  | 53    | 19.2 | 35   | 13   | Gr      | En      | Un            | Ru            | Os      |        |
| Fringillidae   | <i>Spinus xanthogastrus</i>         | x | x | x | 6.4 | 9.6  | 5.3  | 64    | 14.7 | 40   | 12   | Gr      | Cu      | Ca - Un       | Ru            | F       |        |
|                | <i>Spinus psaltria</i>              | x | x | x | 6.4 | 9.7  | 5.1  | 60    | 15.5 | 40   | 9    | Gr - In | Cu      | Un            | Ru            | FE      |        |
|                | <i>Euphonia laniirostris</i>        | x | x | x | x   | 5.6  | 10   | 7.6   | 61   | 17.5 | 37.5 | 15      | Fr - In | En            | Ca - Sca      | Ru      | FE     |
|                | <i>Euphonia cyanocephala</i>        |   | x |   | 4   | 7.6  | 4.8  | 63    | 13.8 | 38   | 17   | Fr      | En      | Ca - Sca      | Ru            | FE      |        |
|                | <i>Euphonia xanthogaster</i>        |   |   | x | 6.4 | 9.6  | 5.3  | 64    | 14.7 | 40   | 12   | Gr      | Cu      | Ca - Un       | Ru            | F       |        |
| Passerellidae  | <i>Arremonops conirostris</i>       | x |   |   | 8.2 | 16   | 6.6  | 77    | 36.2 | 65   | 37.2 | Gr - In | En      | Grf           | Ru            | FE      |        |
|                | <i>Arremon aurantiirostris</i>      |   |   | x | 9.1 | 13.7 | 6.8  | 73    | 26.5 | 61.5 | 9.8  | Gr - In | En      | Un - Grf      | Ru            | F - FE  |        |
|                | <i>Zonotrichia capensis</i>         |   | x | x | 6.6 | 13.7 | 5.7  | 63    | 25.2 | 58   | 22   | Fr - Gr | Cu      | Un - Grf      | Ru            | Os      |        |
| Icteridae      | <i>Icterus spurius</i>              |   |   | x | 5.7 | 19.1 | 5    | 80    | 23.5 | 81   | 24   | Fr - In | En      | Ca - Un       | Ru            | FE - Os |        |
|                | <i>Icterus chrysater</i>            |   |   | x | 9.7 | 24.8 | 5.9  | 94    | 35.2 | 92.5 | 46   | Fr - In | En      | Ca            | Ru            | FE - Os |        |
|                | <i>Molothrus bonariensis</i>        |   |   | x | 9.1 | 20.9 | 7.4  | 110   | 24   | 90.5 | 60   | In      | Cu      | Grf           | Ru            | Os      |        |
| Parulidae      | <i>Parkesia noveboracensis</i>      | x | x | x | x   | 3.7  | 13.5 | 3.7   | 74   | 24   | 51   | 16      | In      | Cu            | Un - Grf      | Ru      | FE     |
|                | <i>Mniotilta varia</i>              |   |   | x | x   | 3.6  | 14.1 | 4     | 70   | 18.1 | 49   | 10.2    | Fr - In | Cu            | Ca - Sca - Un | Ru      | F - FE |
|                | <i>Leiothlypis peregrina</i>        | x | x | x | x   | 3.3  | 10.6 | 3     | 63   | 18.4 | 43   | 10      | In      | Cu            | Ca - Sca      | Ru      | FE     |
|                | <i>Oporornis agilis</i>             | x | x | x | x   | 3.9  | 11.8 | 3.4   | 57.5 | 23.6 | 49.5 | 12      | Fr - In | Cu            | Un - Grf      | Ru      | FE     |
|                | <i>Geothlypis philadelphia</i>      | x |   | x | x   | 3.9  | 12   | 4     | 58   | 23.8 | 50   | 11      | In      | Cu            | Un - Grf      | Ru      | F - FE |
|                | <i>Setophaga pitiayumi</i>          |   | x |   | 3.8 | 12.7 | 4.7  | 55    | 20.5 | 44.5 | 8    | In      | En      | Un            | Ru            | FE      |        |
|                | <i>Setophaga castanea</i>           |   |   | x | 3.6 | 13.7 | 4.7  | 72.5  | 18.4 | 55   | 10   | Fr - In | Cu      | Un            | Ru            | F       |        |
|                | <i>Setophaga fusca</i>              | x | x | x | 3.5 | 12.6 | 4    | 65    | 16.8 | 50.5 | 9    | Fr - In | Cu      | Ca - Un       | Ru            | F       |        |
|                | <i>Setophaga petechia</i>           | x | x | x | 3.2 | 12.3 | 3.7  | 60    | 20.6 | 40   | 9.5  | In      | Cu      | Un            | Ru            | Os      |        |
|                | <i>Setophaga striata</i>            |   |   | x | 3.2 | 14.3 | 3.7  | 72    | 22.2 | 32   | 11   | In      | Cu      | Un            | Ru            | FE      |        |
|                | <i>Myiothlypis fulvicauda</i>       | x |   | x | 3.8 | 16   | 7.1  | 61.5  | 23.3 | 49   | 15.4 | In      | En      | Grf           | Ru            | F - FE  |        |
|                | <i>Basileuterus rufifrons</i>       | x |   |   | 3.8 | 11.8 | 4.7  | 60    | 22.5 | 50   | 6    | Fr - In | En      | Un - Grf      | Ru            | Os      |        |
|                | <i>Basileuterus culicivorus</i>     | x | x | x | 3.8 | 13.7 | 4.9  | 59    | 19.5 | 52   | 11   | In      | En      | Un            | Ru            | F       |        |
|                | <i>Cardellina canadensis</i>        | x | x | x | x   | 3.6  | 12.4 | 4.5   | 62   | 19.8 | 55   | 10      | Fr - In | Cu            | Un            | Ru      | F - FE |

|              |                                 |   |   |   |   |      |      |      |       |      |      |      |                 |    |                  |         |         |
|--------------|---------------------------------|---|---|---|---|------|------|------|-------|------|------|------|-----------------|----|------------------|---------|---------|
|              | <i>Myioborus miniatus</i>       | x | x | x |   | 3.4  | 10.6 | 5    | 64    | 30.3 | 63   | 9    | In              | Cu | Ca - Sca -<br>Un | Tr      | FE      |
| Cardinalidae | <i>Piranga rubra</i>            | x | x | x | x | 8.6  | 18.7 | 8.5  | 92    | 22   | 74.5 | 30.3 | Fr - In         | Cu | Ca - Un          | Ru      | FE      |
|              | <i>Piranga olivacea</i>         |   |   |   | x | 7.9  | 19.5 | 12.3 | 92    | 19.1 | 68   | 26.4 | In              | Cu | Ca               | Ru - Tr | F       |
|              | <i>Habia gutturalis</i>         |   |   |   | x | 8.4  | 19.6 | 7.8  | 93    | 27.1 | 89.5 | 34   | In              | Cu | Un - Grf         | Ru      | F       |
|              | <i>Pheucticus ludovicianus</i>  | x | x |   |   | 12.4 | 18   | 9.2  | 100   | 21.5 | 85   | 47.8 | Fr - In         | Cu | Ca - Sca         | Ru      | FE      |
|              | <i>Cyanoloxia brissonii</i>     | x |   |   | x | 11   | 9.1  | 8    | 71.5  | 23.6 | 63   | 22   | Gr              | Cu | Un               | Ru      | FE      |
| Thraupidae   | <i>Chlorophanes spiza</i>       | x | x | x | x | 4.8  | 16.9 | 8.9  | 70    | 18.7 | 48   | 18.7 | Fr - In -<br>Ne | Cu | Un               | Ru      | FE      |
|              | <i>Hemithraupis guira</i>       | x |   |   |   | 5.2  | 11.7 | 6.1  | 64    | 16.5 | 59   | 23   | In              | Cu | Ca - Un          | Ru      | F - FE  |
|              | <i>Sicalis flaveola</i>         |   |   |   | x | 7.1  | 11.8 | 5.8  | 69    | 22.8 | 50   | 20   | Gr - In         | Cu | Grf              | Ru      | FE - Os |
|              | <i>Volatinia jacarina</i>       | x | x | x | x | 5.9  | 10.8 | 4.6  | 47    | 18.4 | 43   | 10   | Gr - In         | Cu | Grf              | Ru      | FE      |
|              | <i>Loriotus luctuosus</i>       |   | x |   | x | 6    | 16.6 | 9    | 62.5  | 17   | 57   | 13.4 | Fr - In         | Cu | Sca - Un         | Ru      | FE      |
|              | <i>Eucometis penicillata</i>    |   |   |   | x | 7    | 18.8 | 7.1  | 85.5  | 20.2 | 78   | 29.5 | Fr - In         | Cu | Un - Grf         | Ru      | FE      |
|              | <i>Ramphocelus dimidiatus</i>   | x | x | x |   | 8    | 15.7 | 7    | 76    | 23.4 | 74   | 28   | Fr - In         | Cu | Un               | Ru      | FE      |
|              | <i>Ramphocelus flammigerus</i>  |   | x |   |   | 9.3  | 16.4 | 8.8  | 88    | 26.5 | 80   | 40   | Fr - In         | Cu | Ca - Un          | Ru      | F       |
|              | <i>Sporophila minuta</i>        |   |   | x | x | 5.2  | 9.5  | 4.1  | 49    | 16.7 | 39   | 8    | Gr              | Cu | Grf              | Ru      | Os      |
|              | <i>Sporophila funerea</i>       |   |   | x | x | 9.7  | 12.1 | 9.9  | 53.5  | 17.9 | 47   | 12.3 | Gr              | Cu | Un - Grf         | Ru      | FE      |
|              | <i>Sporophila crassirostris</i> | x |   | x |   | 12.6 | 17.8 | 9.7  | 64.5  | 18.1 | 62   | 22   | Gr              | Cu | Grf              | Ru      | FE      |
|              | <i>Sporophila intermedia</i>    | x | x | x |   | 7.7  | 10.2 | 5.5  | 54.5  | 19.3 | 45   | 11   | Gr              | Cu | Grf              | Ru      | FE      |
|              | <i>Sporophila luctuosa</i>      |   | x |   |   | 7.4  | 8.8  | 6.8  | 55    | 19.1 | 44   | 13.5 | Gr              | Cu | Un               | Ru      | FE      |
|              | <i>Sporophila nigricollis</i>   | x | x | x |   | 6.6  | 9    | 4.7  | 52    | 17.2 | 42   | 9.5  | Gr              | Cu | Grf              | Ru      | Os      |
|              | <i>Saltator maximus</i>         |   |   |   | x | 10   | 19.1 | 9.1  | 93.5  | 27.6 | 44.5 | 44.5 | Fr - In         | Cu | Ca               | Ru      | F       |
|              | <i>Saltator atripennis</i>      |   |   |   | x | 11.3 | 20.9 | 9.8  | 101.5 | 23.8 | 100  | 54.5 | Fr              | Cu | Ca               | Ru      | F       |
|              | <i>Saltator striatipectus</i>   | x | x | x |   | 12.6 | 20.5 | 9.5  | 90    | 28.2 | 86   | 39   | Fr - In         | Cu | Ca               | Ru      | F       |
|              | <i>Coereba flaveola</i>         | x | x | x | x | 3.9  | 14.2 | 3.8  | 53.5  | 16.7 | 32   | 9    | Fr - Ne         | En | Ca - Sca         | Th      | FE - Os |
|              | <i>Tiaris olivaceus</i>         | x | x | x | x | 5.6  | 9.1  | 4.2  | 50    | 19   | 42   | 10   | Gr - In         | En | Grf              | Ru      | FE      |
|              | <i>Asemospiza obscura</i>       |   | x |   | x | 7.1  | 10.4 | 6.3  | 53    | 19.3 | 74   | 11   | Fr - Gr         | En | Un               | Ru      | F       |
|              | <i>Melanospiza bicolor</i>      | x |   |   |   | 6.2  | 9.2  | 4.4  | 55    | 17.4 | 35   | 13   | Fr - Gr         | En | Un               | Ru      | Os      |
|              | <i>Stilpnia heinei</i>          |   | x |   |   | 5.1  | 8.1  | 5.1  | 71    | 20.2 | 48   | 20.5 | Fr - In         | Cu | Ca               | Ru      | FE      |
|              | <i>Stilpnia vitriolina</i>      | x | x | x | x | 5.8  | 12.2 | 5.9  | 73    | 21.3 | 58   | 22   | Fr - In         | Cu | Ca               | Ru      | FE      |
|              | <i>Stilpnia cyanicollis</i>     | x |   | x | x | 4.8  | 11.5 | 4.3  | 65.5  | 18.5 | 47.5 | 18   | Fr - In         | Cu | Ca - Un          | Ru      | FE - Os |
|              | <i>Tangara inornata</i>         | x |   |   | x | 4.8  | 11.3 | 4.9  | 55    | 25.6 | 45   | 15   | Fr - In         | Cu | Ca               | Ru      | FE      |
|              | <i>Tangara gyrola</i>           | x | x | x | x | 5.6  | 12.4 | 5.5  | 73.5  | 19.7 | 50   | 19.5 | Fr - In         | Cu | Ca - Un          | Ru      | FE      |
|              | <i>Thraupis episcopus</i>       | x | x | x | x | 6.3  | 14.4 | 6.8  | 87    | 23.3 | 65   | 33   | Fr - In         | Cu | Ca               | Ru      | FE - Os |
|              | <i>Thraupis palmarum</i>        | x | x | x | x | 7    | 14.6 | 5.9  | 92    | 25.1 | 71   | 36   | Fr - In         | Cu | Ca               | Ru      | Os      |

**Table S2.** Mean values of the functional diversity indices (RaoQ, FRic, FEve, and FDiv) estimated at the cocoa, coffee, and citrus agroecosystems, and at the secondary forests. Results are presented separately for morphological, life history, and behavioral traits.

| Traits        | Index | Cocoa | Coffee | Citrus | Forest |
|---------------|-------|-------|--------|--------|--------|
| Morphological | RaoQ  | 0.054 | 0.058  | 0.035  | 0.033  |
|               | FRic  | 3.658 | 4.974  | 6.371  | 3.057  |
|               | FEve  | 0.671 | 0.674  | 0.703  | 0.703  |
|               | FDiv  | 0.686 | 0.69   | 0.679  | 0.738  |
| Life history  | RaoQ  | 0.53  | 0.497  | 0.458  | 0.295  |
|               | FRic  | 8.175 | 9.211  | 10.167 | 2.351  |
|               | FEve  | 0.559 | 0.653  | 0.487  | 0.47   |
|               | FDiv  | 0.801 | 0.787  | 0.803  | 0.734  |
| Behavioral    | RaoQ  | 0.383 | 0.34   | 0.385  | 0.242  |
|               | FRic  | 8.093 | 5.555  | 11.454 | 3.292  |
|               | FEve  | 0.797 | 0.784  | 0.762  | 0.745  |
|               | FDiv  | 0.756 | 0.735  | 0.702  | 0.783  |

**Table S3.** Results of the Generalized Linear Models comparing morphological, life history, and behavioral traits among agroecosystems and secondary forests. Bold figures denote significant comparisons.

| (A) MORPHOLOGICAL TRAITS |            |                          |               |              |                |               |                   |
|--------------------------|------------|--------------------------|---------------|--------------|----------------|---------------|-------------------|
|                          |            |                          | Estimate      | SE           | df             | t Value       | p Value           |
| RaoQ                     | Intercepts | Forest Intercept         | -2.796        | 0.118        | 23.982         | -23.73        | < 0.001           |
|                          |            | Cocoa intercept          | -2.617        | 0.136        | 19.487         | -19.25        | < 0.001           |
|                          |            | Intercept Coffee         | -2.577        | 0.144        | 17.561         | -17.91        | < 0.001           |
|                          |            | Citrus Intercept         | -2.665        | 0.166        | 18.492         | -16.06        | < 0.001           |
|                          | Contrasts  | Forest vs. Cocoa         | 0.179         | 0.18         | 21.259         | 0.995         | 0.331             |
|                          |            | Forest vs. Coffee        | 0.219         | 0.186        | 19.813         | 1.178         | 0.253             |
|                          |            | Forest vs. Citric        | 0.13          | 0.204        | 20.118         | 0.641         | 0.529             |
|                          |            | Cocoa vs. Coffee         | 0.04          | 0.198        | 18.435         | 0.202         | 0.842             |
|                          |            | Cocoa vs. Citric         | -0.049        | 0.215        | 18.883         | -0.227        | 0.823             |
|                          |            | Coffee vs. Citric        | -0.089        | 0.22         | 18.084         | -0.403        | 0.691             |
| FRic                     | Intercepts | Forest Intercept         | 0.443         | 0.353        | 21.072         | 1.253         | 0.224             |
|                          |            | Cocoa intercept          | 1.144         | 0.405        | 16.635         | 2.825         | 0.012             |
|                          |            | Intercept Coffee         | 1.234         | 0.427        | 14.793         | 2.891         | 0.011             |
|                          |            | Citrus Intercept         | 1.787         | 0.493        | 15.476         | 3.624         | 0.002             |
|                          | Contrasts  | Forest vs. Cocoa         | 0.701         | 0.537        | 18.376         | 1.304         | 0.208             |
|                          |            | Forest vs. Coffee        | 0.791         | 0.554        | 16.98          | 1.427         | 0.172             |
|                          |            | <b>Forest vs. Citric</b> | <b>1.345</b>  | <b>0.607</b> | <b>17.112</b>  | <b>2.216</b>  | <b>0.041</b>      |
|                          |            | Cocoa vs. Coffee         | 0.09          | 0.588        | 15.628         | 0.152         | 0.881             |
|                          |            | Cocoa vs. Citric         | 0.644         | 0.638        | 15.929         | 1.008         | 0.328             |
|                          |            | Coffee vs. Citric        | 0.554         | 0.652        | 15.178         | 0.849         | 0.409             |
| FEve                     | Intercepts | Forest Intercept         | -0.24         | 0.019        | 22.491         | -12.71        | < 0.001           |
|                          |            | Cocoa intercept          | -0.267        | 0.021        | 17.395         | -12.448       | < 0.001           |
|                          |            | Intercept Coffee         | -0.267        | 0.022        | 15.295         | -11.875       | < 0.001           |
|                          |            | Citrus Intercept         | -0.247        | 0.026        | 15.817         | -9.471        | < 0.001           |
|                          | Contrasts  | Forest vs. Cocoa         | -0.027        | 0.029        | 19.397         | -0.952        | 0.353             |
|                          |            | Forest vs. Coffee        | -0.027        | 0.029        | 17.807         | -0.935        | 0.362             |
|                          |            | Forest vs. Citric        | -0.007        | 0.032        | 17.756         | -0.215        | 0.832             |
|                          |            | Cocoa vs. Coffee         | 0.0000        | 0.031        | 16.247         | -0.009        | 0.993             |
|                          |            | Cocoa vs. Citric         | 0.0200        | 0.034        | 16.429         | 0.601         | 0.556             |
|                          |            | Coffee vs. Citric        | 0.021         | 0.034        | 15.591         | 0.597         | 0.559             |
| FDiv                     | Intercepts | Forest Intercept         | -0.228        | 0.011        | 108.000        | -21.23        | < 0.001           |
|                          |            | Cocoa intercept          | -0.265        | 0.012        | 108.000        | -22.83        | < 0.001           |
|                          |            | Intercept Coffee         | -0.263        | 0.012        | 108.000        | -22.3         | < 0.001           |
|                          |            | Citrus Intercept         | -0.272        | 0.014        | 108.000        | -19.92        | < 0.001           |
|                          | Contrasts  | <b>Forest vs. Cocoa</b>  | <b>-0.037</b> | <b>0.016</b> | <b>108.000</b> | <b>-2.368</b> | <b>0.02</b>       |
|                          |            | <b>Forest vs. Coffee</b> | <b>-0.036</b> | <b>0.016</b> | <b>108.000</b> | <b>-2.245</b> | <b>0.027</b>      |
|                          |            | <b>Forest vs. Citric</b> | <b>-0.044</b> | <b>0.017</b> | <b>108.000</b> | <b>-2.545</b> | <b>0.012</b>      |
|                          |            | Cocoa vs. Coffee         | 0.002         | 0.017        | 108.000        | 0.097         | 0.923             |
|                          |            | Cocoa vs. Citric         | -0.007        | 0.018        | 108.000        | -0.376        | 0.707             |
|                          |            | Coffee vs. Citric        | -0.008        | 0.018        | 108.000        | -0.462        | 0.645             |
| (B) LIFE HISTORY TRAITS  |            |                          |               |              |                |               |                   |
|                          |            |                          | Estimate      | SE           | df             | t Value       | p Value           |
| RaoQ                     | Intercepts | Forest Intercept         | -0.819        | 0.033        | 107.000        | -25.16        | < 0.001           |
|                          |            | Cocoa intercept          | -0.522        | 0.035        | 107.000        | -15.05        | < 0.001           |
|                          |            | Intercept Coffee         | -0.560        | 0.035        | 107.000        | -15.87        | < 0.001           |
|                          |            | Citrus Intercept         | -0.610        | 0.041        | 107.000        | -14.96        | < 0.001           |
|                          | Contrasts  | <b>Forest vs. Cocoa</b>  | <b>0.296</b>  | <b>0.048</b> | <b>107.000</b> | <b>6.231</b>  | <b>&lt; 0.001</b> |
|                          |            | <b>Forest vs. Coffee</b> | <b>0.258</b>  | <b>0.048</b> | <b>107.000</b> | <b>5.378</b>  | <b>&lt; 0.001</b> |
|                          |            | <b>Forest vs. Citric</b> | <b>0.208</b>  | <b>0.052</b> | <b>107.000</b> | <b>3.995</b>  | <b>&lt; 0.001</b> |
|                          |            | Cocoa vs. Coffee         | -0.038        | 0.05         | 107.000        | -0.77         | 0.443             |
|                          |            | Cocoa vs. Citric         | -0.088        | 0.054        | 107.000        | -1.643        | 0.103             |
|                          |            | Coffee vs. Citric        | -0.050        | 0.054        | 107.000        | -0.924        | 0.357             |
| FRic                     | Intercepts | Forest Intercept         | 0.636         | 0.44         | 23.349         | 1.445         | < 0.001           |
|                          |            | Cocoa intercept          | 3.683         | 0.472        | 16.500         | 7.796         | < 0.001           |
|                          |            | Intercept Coffee         | 4.116         | 0.5          | 15.096         | 8.226         | < 0.001           |
|                          |            | Citrus Intercept         | 4.491         | 0.575        | 15.326         | 7.807         | < 0.001           |
|                          | Contrasts  | <b>Forest vs. Cocoa</b>  | <b>3.047</b>  | <b>0.646</b> | <b>19.279</b>  | <b>4.719</b>  | <b>&lt; 0.001</b> |

|                       |            |                   |        |       |         |         |         |
|-----------------------|------------|-------------------|--------|-------|---------|---------|---------|
| FEve                  |            | Forest vs. Coffee | 3.481  | 0.666 | 18.095  | 5.223   | < 0.001 |
|                       |            | Forest vs. Citric | 3.855  | 0.724 | 17.763  | 5.323   | < 0.001 |
|                       |            | Cocoa vs. Coffee  | 0.434  | 0.688 | 15.735  | 0.63    | 0.538   |
|                       |            | Cocoa vs. Citric  | 0.808  | 0.744 | 15.784  | 1.086   | 0.294   |
|                       |            | Coffee vs. Citric | 0.375  | 0.762 | 15.226  | 0.491   | 0.630   |
|                       | Intercepts | Forest Intercept  | -0.639 | 0.049 | 20.908  | -13.071 | < 0.001 |
|                       |            | Cocoa intercept   | -0.520 | 0.049 | 13.421  | -13.071 | < 0.001 |
|                       |            | Intercept Coffee  | -0.397 | 0.051 | 11.684  | -7.757  | < 0.001 |
|                       |            | Citrus Intercept  | -0.617 | 0.058 | 9.924   | -10.609 | < 0.001 |
|                       | Contrasts  | Forest vs. Cocoa  | 0.119  | 0.069 | 16.562  | 1.713   | 0.105   |
|                       |            | Forest vs. Coffee | 0.242  | 0.071 | 15.162  | 3.423   | 0.004   |
|                       |            | Forest vs. Citric | 0.022  | 0.076 | 13.139  | 0.284   | 0.781   |
|                       |            | Cocoa vs. Coffee  | 0.123  | 0.071 | 12.477  | 1.737   | 0.107   |
|                       |            | Cocoa vs. Citric  | -0.097 | 0.076 | 11.202  | -1.276  | 0.228   |
|                       |            | Coffee vs. Citric | -0.221 | 0.077 | 10.64   | -2.848  | 0.016   |
| FDiv                  | Intercepts | Forest Intercept  | -0.170 | 0.007 | 24.75   | -23.700 | < 0.001 |
|                       |            | Cocoa intercept   | -0.143 | 0.007 | 16.464  | -19.390 | < 0.001 |
|                       |            | Intercept Coffee  | -0.153 | 0.008 | 14.654  | -19.900 | < 0.001 |
|                       |            | Citrus Intercept  | -0.144 | 0.009 | 13.35   | -16.370 | < 0.001 |
|                       | Contrasts  | Forest vs. Cocoa  | 0.027  | 0.01  | 19.931  | 2.675   | 0.015   |
|                       |            | Forest vs. Coffee | 0.017  | 0.011 | 18.464  | 1.634   | 0.119   |
|                       |            | Forest vs. Citric | 0.026  | 0.011 | 16.787  | 2.300   | 0.035   |
|                       |            | Cocoa vs. Coffee  | -0.010 | 0.011 | 15.482  | -0.970  | 0.347   |
|                       |            | Cocoa vs. Citric  | -0.001 | 0.011 | 14.521  | -0.120  | 0.906   |
|                       |            | Coffee vs. Citric | 0.009  | 0.012 | 13.894  | 0.765   | 0.457   |
| (C) BEHAVIORAL TRAITS |            |                   |        |       |         |         |         |
|                       |            | Estimate          | SE     | df    | t Value | P Value |         |
| RaoQ                  | Intercepts | Forest Intercept  | -0.956 | 0.037 | 24.576  | -26.14  | < 0.001 |
|                       |            | Cocoa intercept   | -0.743 | 0.042 | 20.127  | -17.56  | < 0.001 |
|                       |            | Intercept Coffee  | -0.800 | 0.045 | 18.201  | -17.85  | < 0.001 |
|                       |            | Citrus Intercept  | -0.730 | 0.052 | 19.196  | -14.12  | < 0.001 |
|                       | Contrasts  | Forest vs. Cocoa  | 0.214  | 0.056 | 21.883  | 3.818   | 0.001   |
|                       |            | Forest vs. Coffee | 0.156  | 0.058 | 20.441  | 2.704   | 0.013   |
|                       |            | Forest vs. Citric | 0.227  | 0.063 | 20.794  | 3.584   | 0.002   |
|                       |            | Cocoa vs. Coffee  | -0.057 | 0.062 | 19.076  | -0.927  | 0.365   |
|                       |            | Cocoa vs. Citric  | 0.013  | 0.067 | 19.563  | 0.2     | 0.843   |
|                       |            | Coffee vs. Citric | 0.071  | 0.068 | 18.76   | 1.031   | 0.316   |
| FRic                  | Intercepts | Forest Intercept  | 1.126  | 0.389 | 22.42   | 2.898   | 0.008   |
|                       |            | Cocoa intercept   | 2.901  | 0.452 | 18.628  | 6.418   | < 0.001 |
|                       |            | Intercept Coffee  | 2.065  | 0.48  | 16.952  | 4.3     | < 0.001 |
|                       |            | Citrus Intercept  | 3.761  | 0.553 | 17.971  | 6.805   | < 0.001 |
|                       | Contrasts  | Forest vs. Cocoa  | 1.775  | 0.596 | 20.122  | 2.978   | 0.007   |
|                       |            | Forest vs. Coffee | 0.939  | 0.618 | 18.866  | 1.52    | 0.145   |
|                       |            | Forest vs. Citric | 2.635  | 0.676 | 19.295  | 3.901   | 0.001   |
|                       |            | Cocoa vs. Coffee  | -0.836 | 0.659 | 17.712  | -1.268  | 0.221   |
|                       |            | Cocoa vs. Citric  | 0.860  | 0.714 | 18.23   | 1.205   | 0.244   |
|                       |            | Coffee vs. Citric | 1.696  | 0.732 | 17.522  | 2.317   | 0.033   |
| FEve                  | Intercepts | Forest Intercept  | -0.201 | 0.016 | 18.963  | -12.556 | < 0.001 |
|                       |            | Cocoa intercept   | -0.16  | 0.018 | 13.7    | -9.499  | < 0.001 |
|                       |            | Intercept Coffee  | -0.174 | 0.019 | 11.515  | -9.432  | < 0.001 |
|                       |            | Citrus Intercept  | -0.192 | 0.021 | 11.467  | -8.956  | < 0.001 |
|                       | Contrasts  | Forest vs. Cocoa  | 0.032  | 0.024 | 15.753  | 1.317   | 0.207   |
|                       |            | Forest vs. Coffee | 0.026  | 0.024 | 14.076  | 1.081   | 0.298   |
|                       |            | Forest vs. Citric | 0.009  | 0.027 | 13.564  | 0.334   | 0.743   |
|                       |            | Cocoa vs. Coffee  | -0.005 | 0.026 | 12.499  | -0.199  | 0.845   |
|                       |            | Cocoa vs. Citric  | -0.023 | 0.028 | 12.312  | -0.811  | 0.433   |
|                       |            | Coffee vs. Citric | -0.018 | 0.028 | 11.487  | -0.618  | 0.549   |
| FDiv                  | Intercepts | Forest Intercept  | -0.195 | 0.015 | 22.032  | -13.04  | < 0.001 |
|                       |            | Cocoa intercept   | -0.224 | 0.017 | 17.982  | -12.96  | < 0.001 |
|                       |            | Intercept Coffee  | -0.241 | 0.018 | 16.238  | -13.16  | < 0.001 |
|                       |            | Citrus Intercept  | -0.266 | 0.021 | 17.156  | -12.6   | < 0.001 |
|                       | Contrasts  | Forest vs. Cocoa  | -0.029 | 0.023 | 19.575  | -1.275  | 0.217   |
|                       |            | Forest vs. Coffee | -0.046 | 0.024 | 18.263  | -1.956  | 0.066   |

|                          |               |              |               |               |              |
|--------------------------|---------------|--------------|---------------|---------------|--------------|
| <b>Forest vs. Citric</b> | <b>-0.071</b> | <b>0.026</b> | <b>18.599</b> | <b>-2.754</b> | <b>0.013</b> |
| Cocoa vs. Coffee         | -0.017        | 0.025        | 17.029        | -0.679        | 0.506        |
| Cocoa vs. Citric         | -0.042        | 0.027        | 17.481        | -1.543        | 0.141        |
| Coffee vs. Citric        | -0.025        | 0.028        | 16.753        | -0.894        | 0.384        |

---
